# Supplementary material
Source: PubMed Central journal article supplement (PMC9137388)

**Figure S2**

**A**

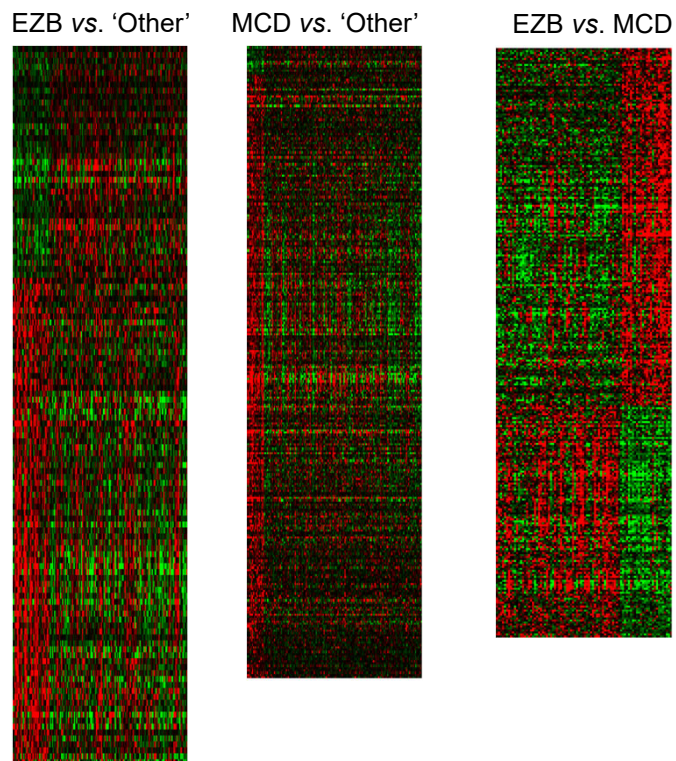

**B**

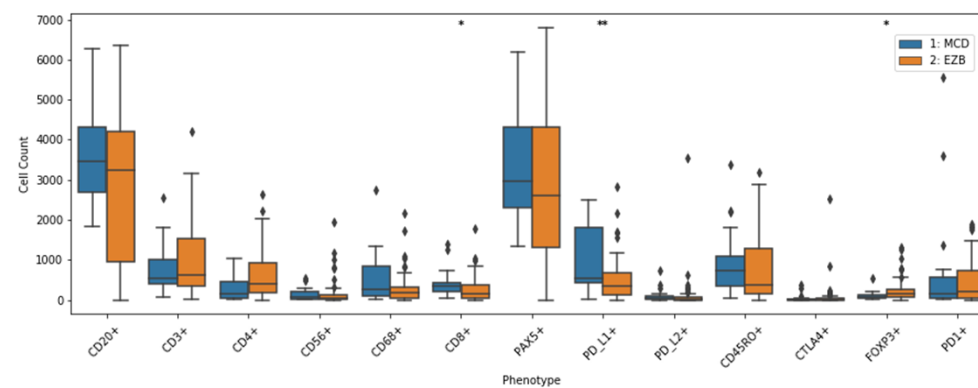

A53/MCD/ST2 vs. EZB/BN2:  $P = 0.0011, 0.0023$   
 A53/MCD/ST2 vs. Other:  $P < 0.0001, < 0.0001$   
 EZB/BN2 vs. Other:  $P = 0.019, 0.021$

A53/EZB vs. BN2/Other:  $P = 0.0016, 0.0004$   
 MCD/ST2 vs. BN2/Other:  $P = 0.094, 0.15$   
 MCD/ST2 vs. A53/EZB:  $P = 0.40, 0.20$

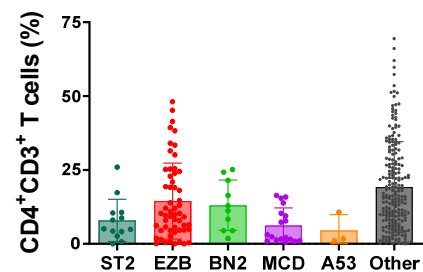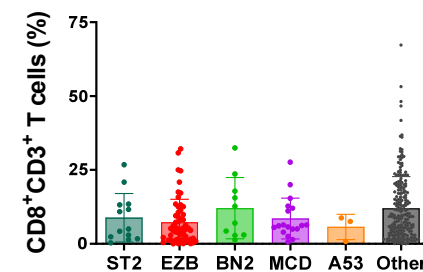

Supplement: NIHMS1804310-supplement-3.pdf [file NIHMS1804310-supplement-3.pdf]
