# Supplementary material
Source: PubMed Central journal article supplement (PMC9137388)

# Figure S9

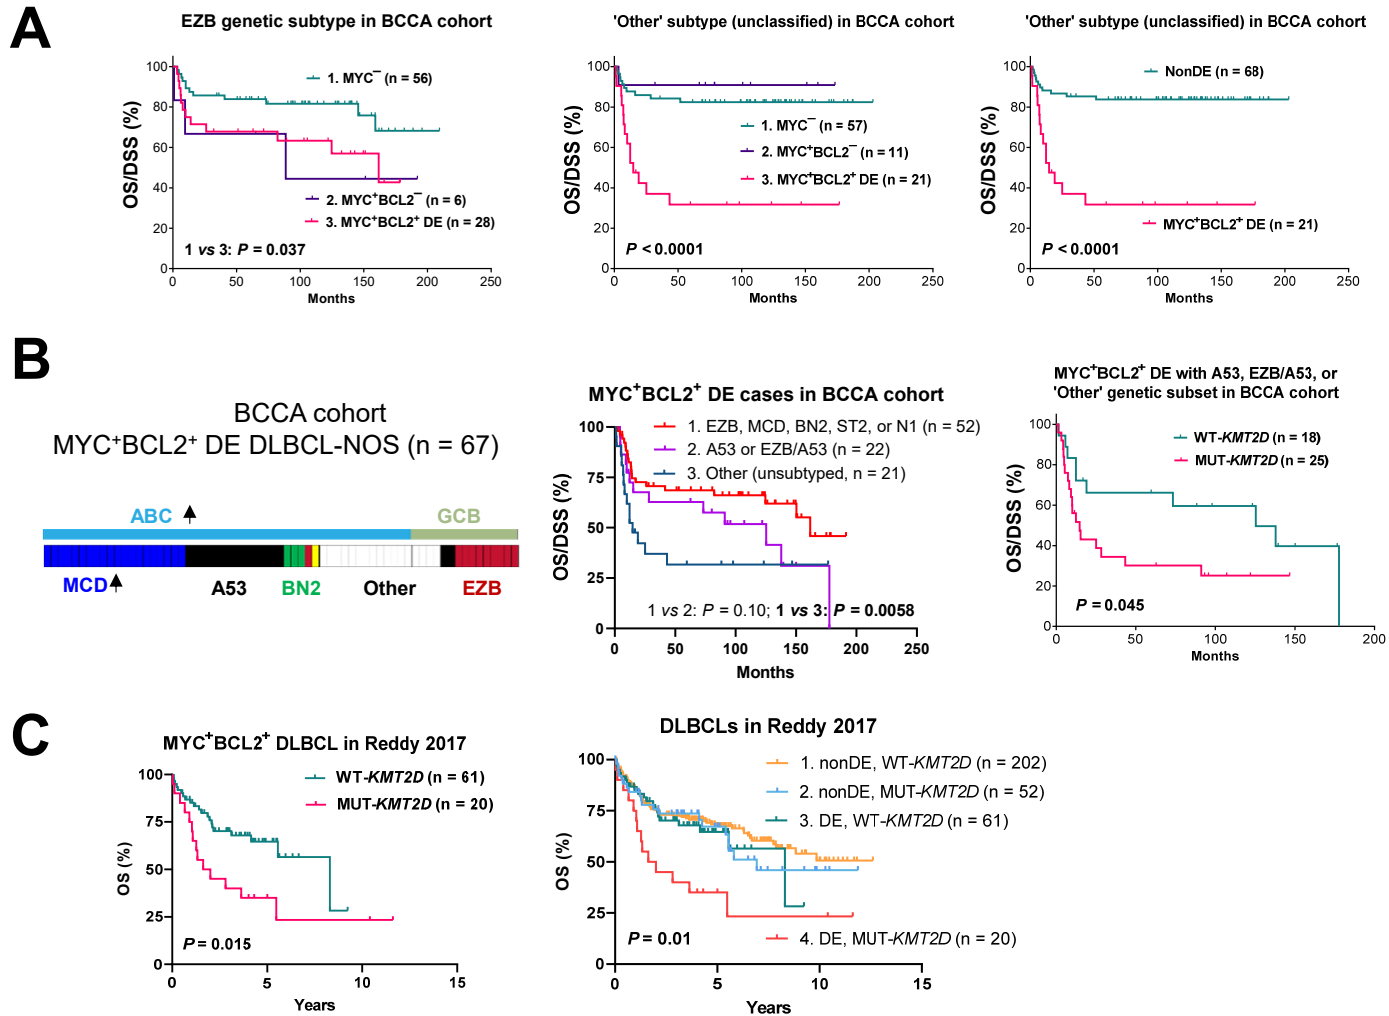

Supplement: NIHMS1804310-supplement-10.pdf [file NIHMS1804310-supplement-10.pdf]

# Figure S10

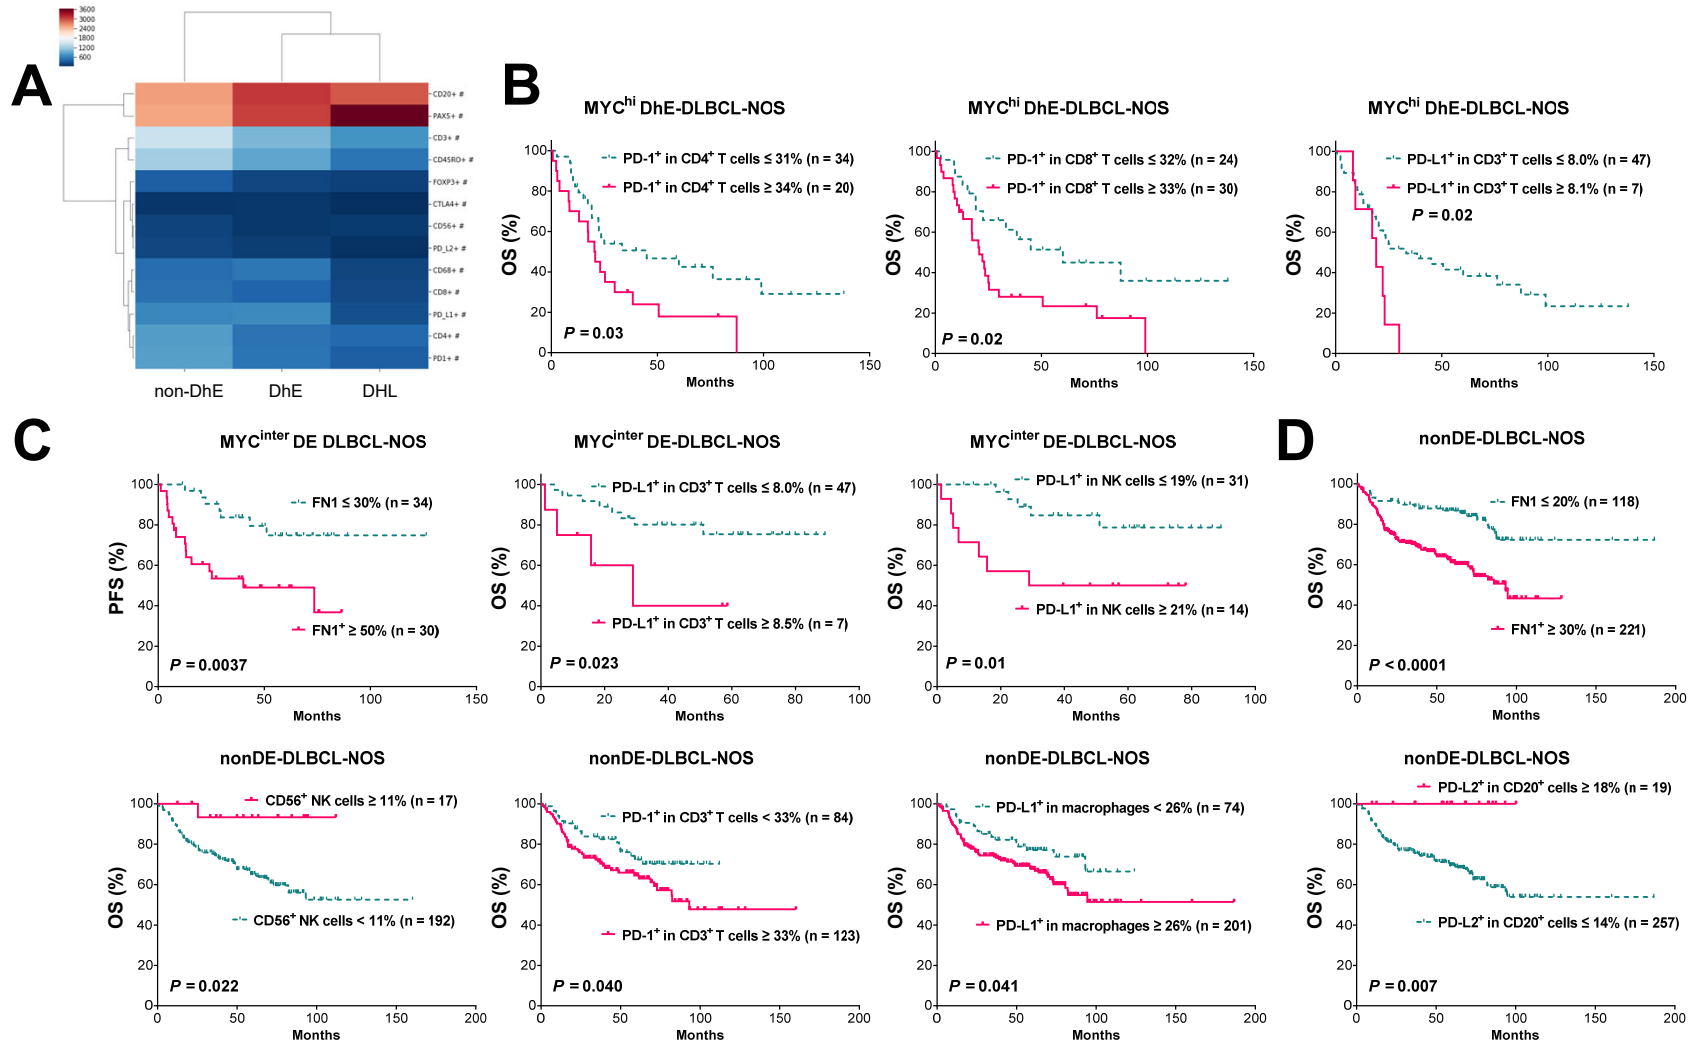

Supplement: NIHMS1804310-supplement-11.pdf [file NIHMS1804310-supplement-11.pdf]

**Figure S1**

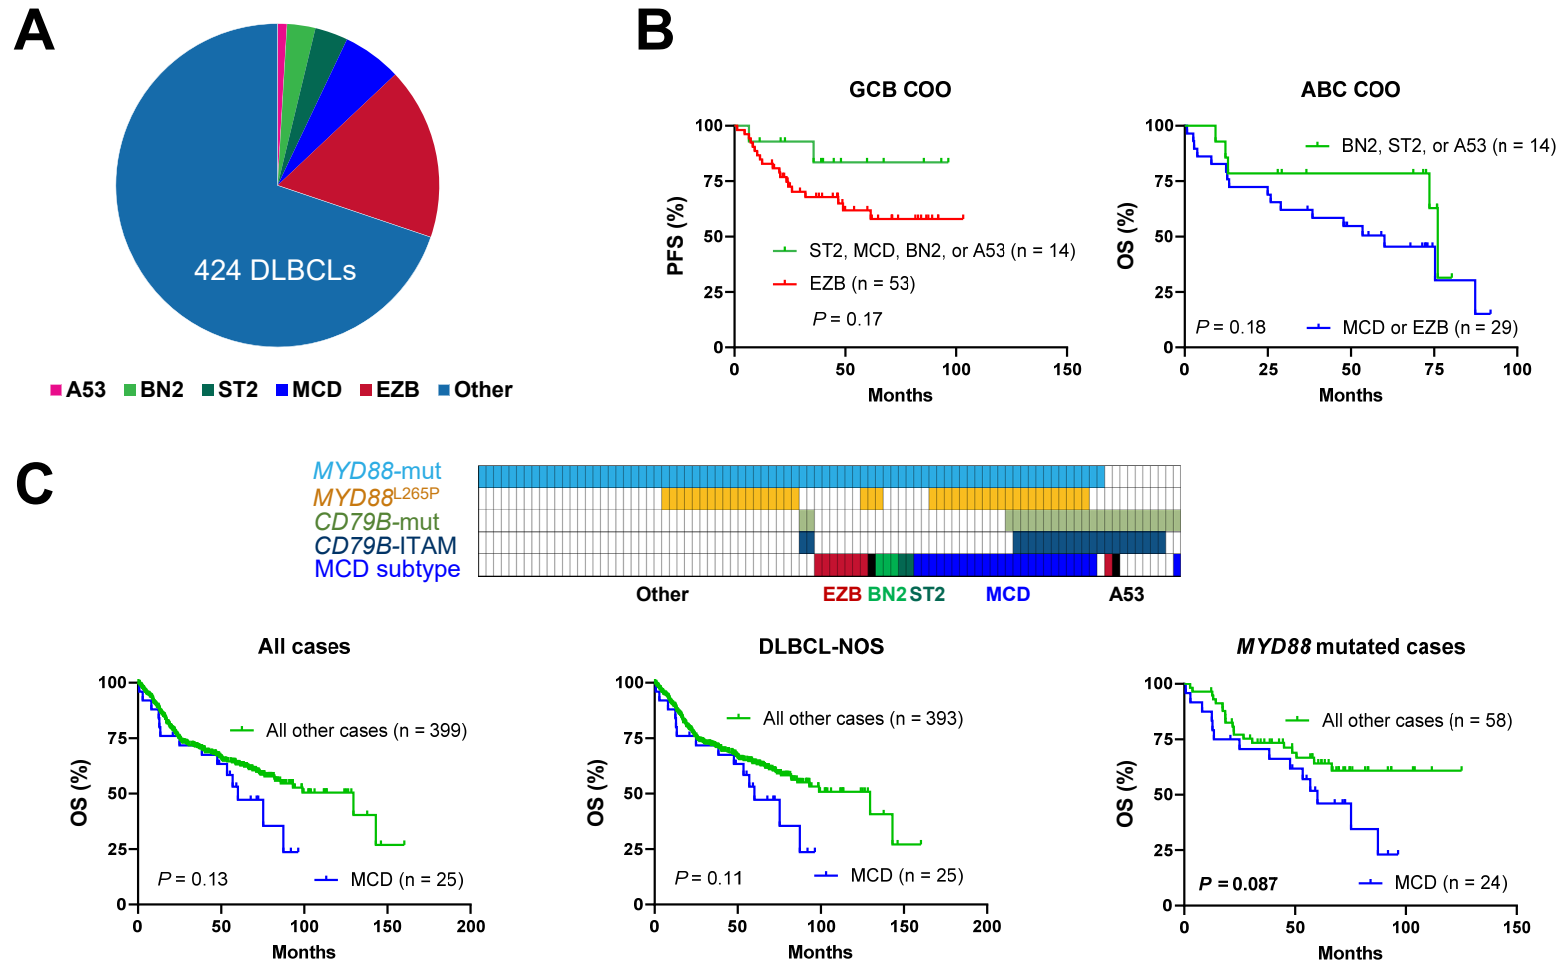

Supplement: NIHMS1804310-supplement-2.pdf [file NIHMS1804310-supplement-2.pdf]

# Figure S3

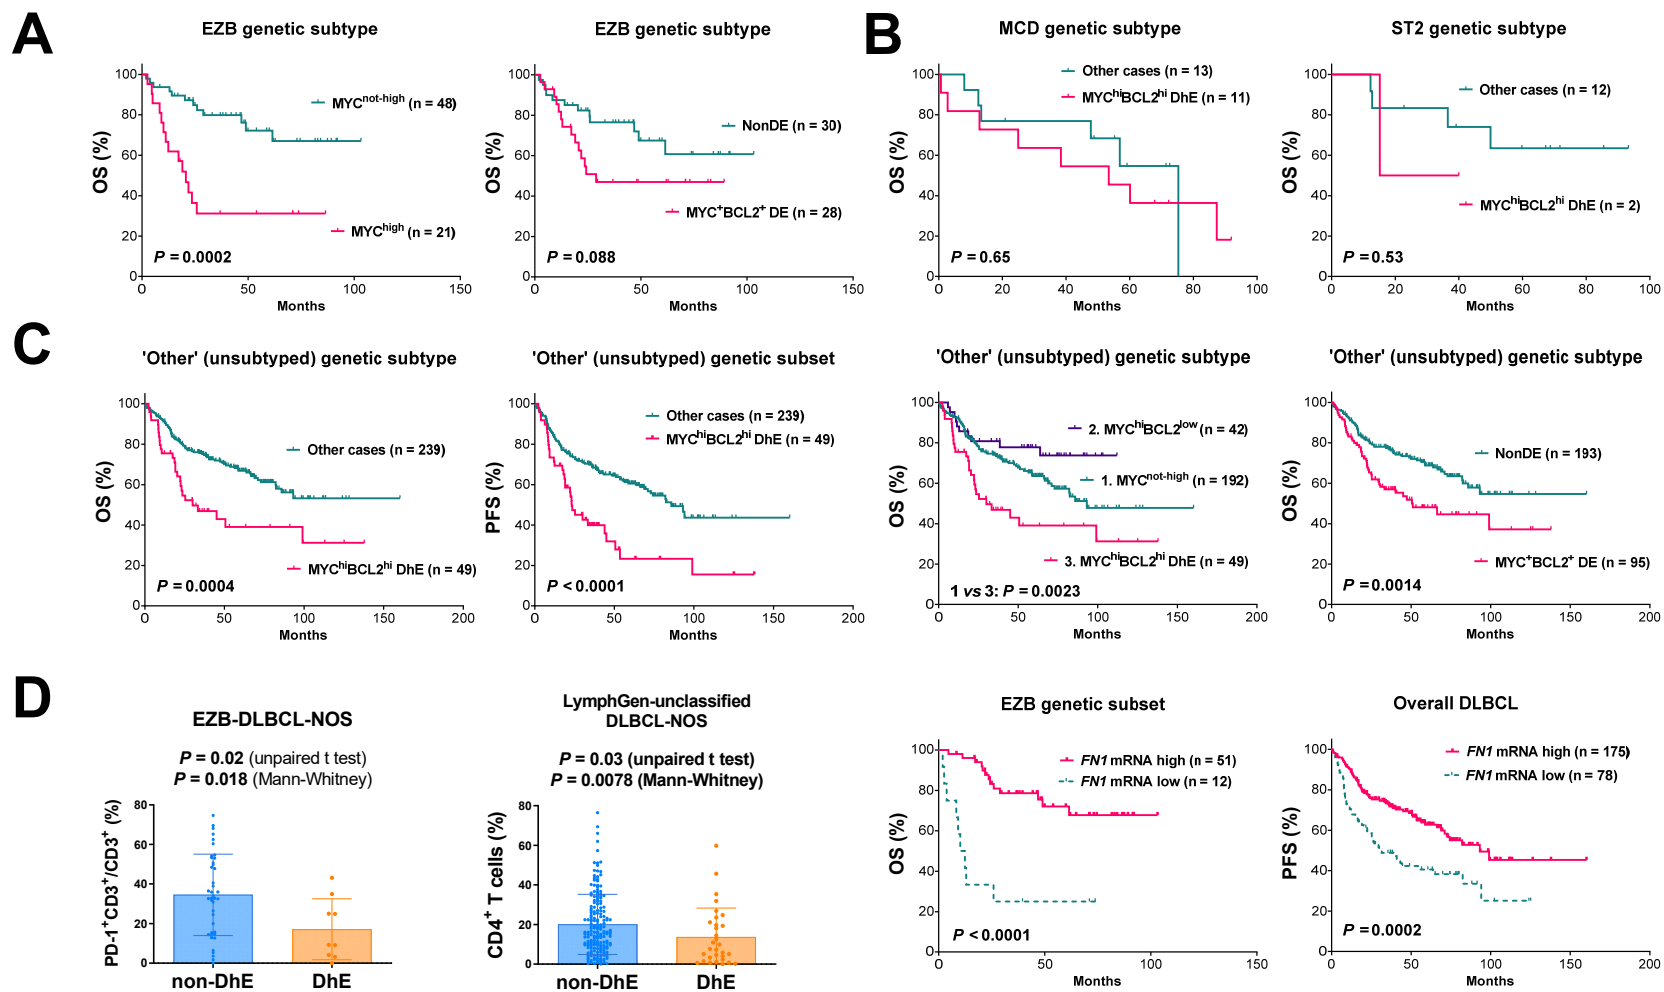

Supplement: NIHMS1804310-supplement-4.pdf [file NIHMS1804310-supplement-4.pdf]

# Figure S4

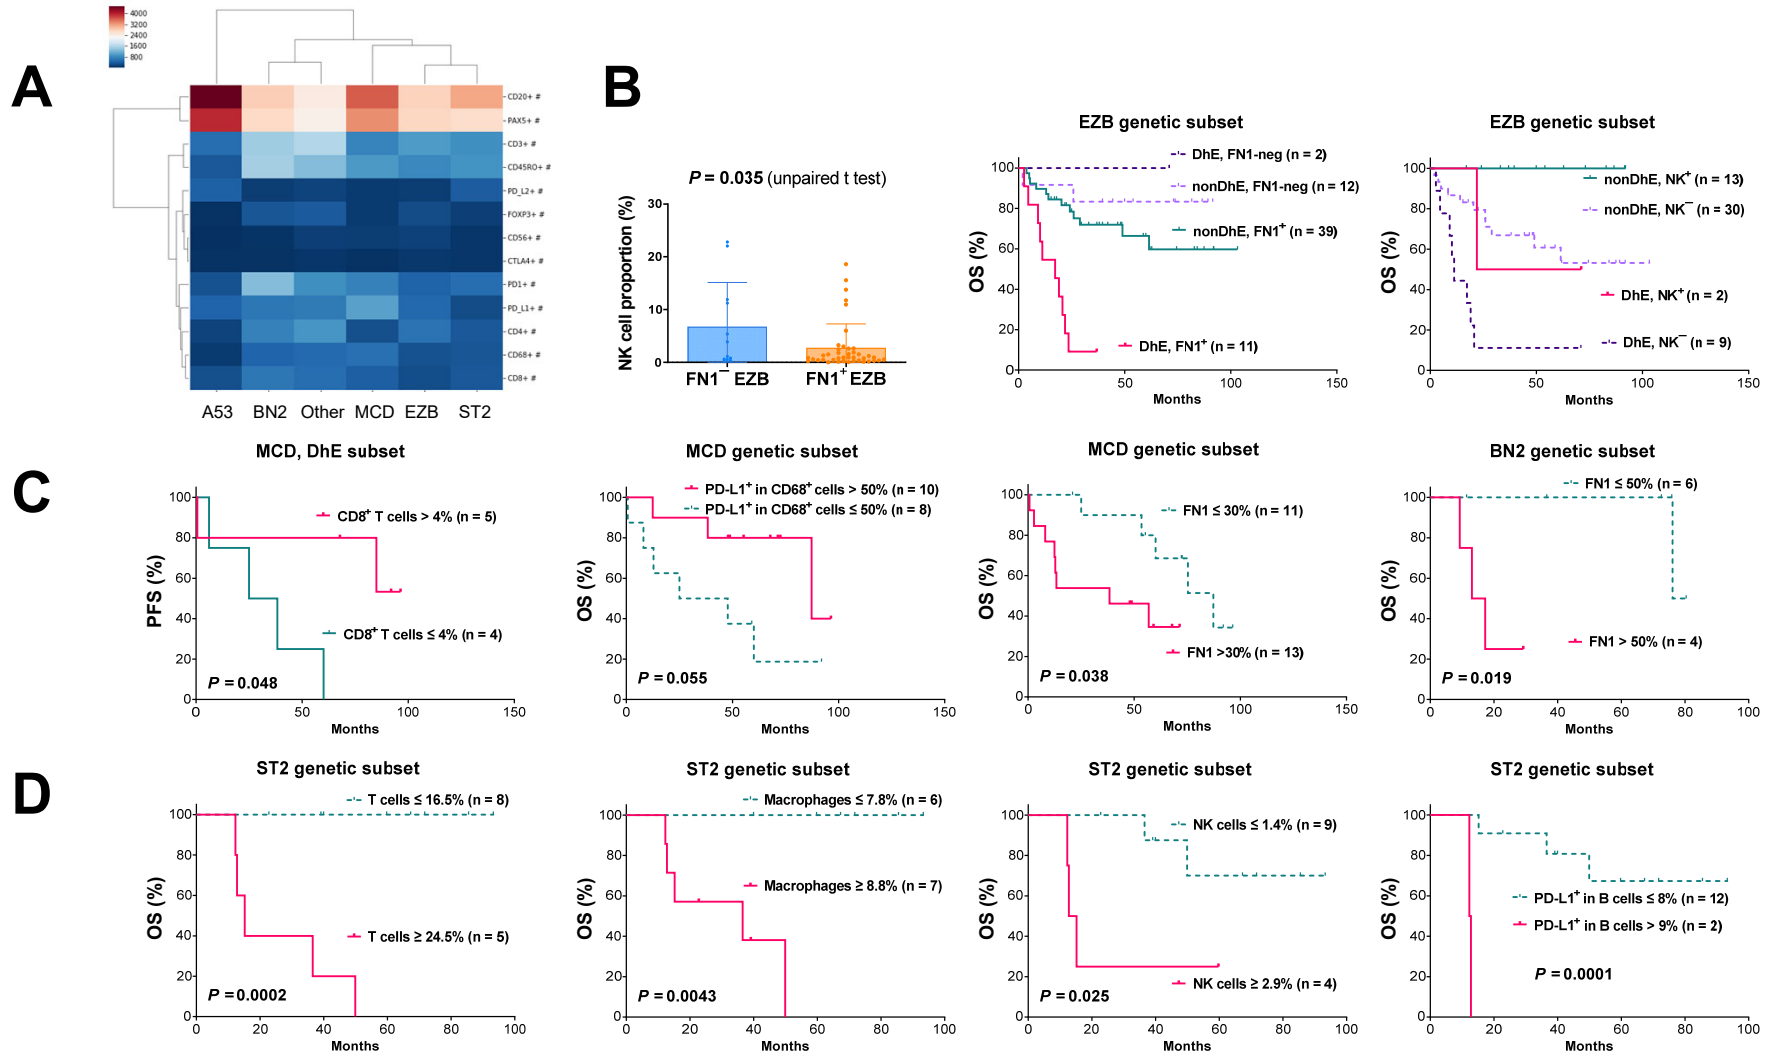

Supplement: NIHMS1804310-supplement-5.pdf [file NIHMS1804310-supplement-5.pdf]

# Figure S5

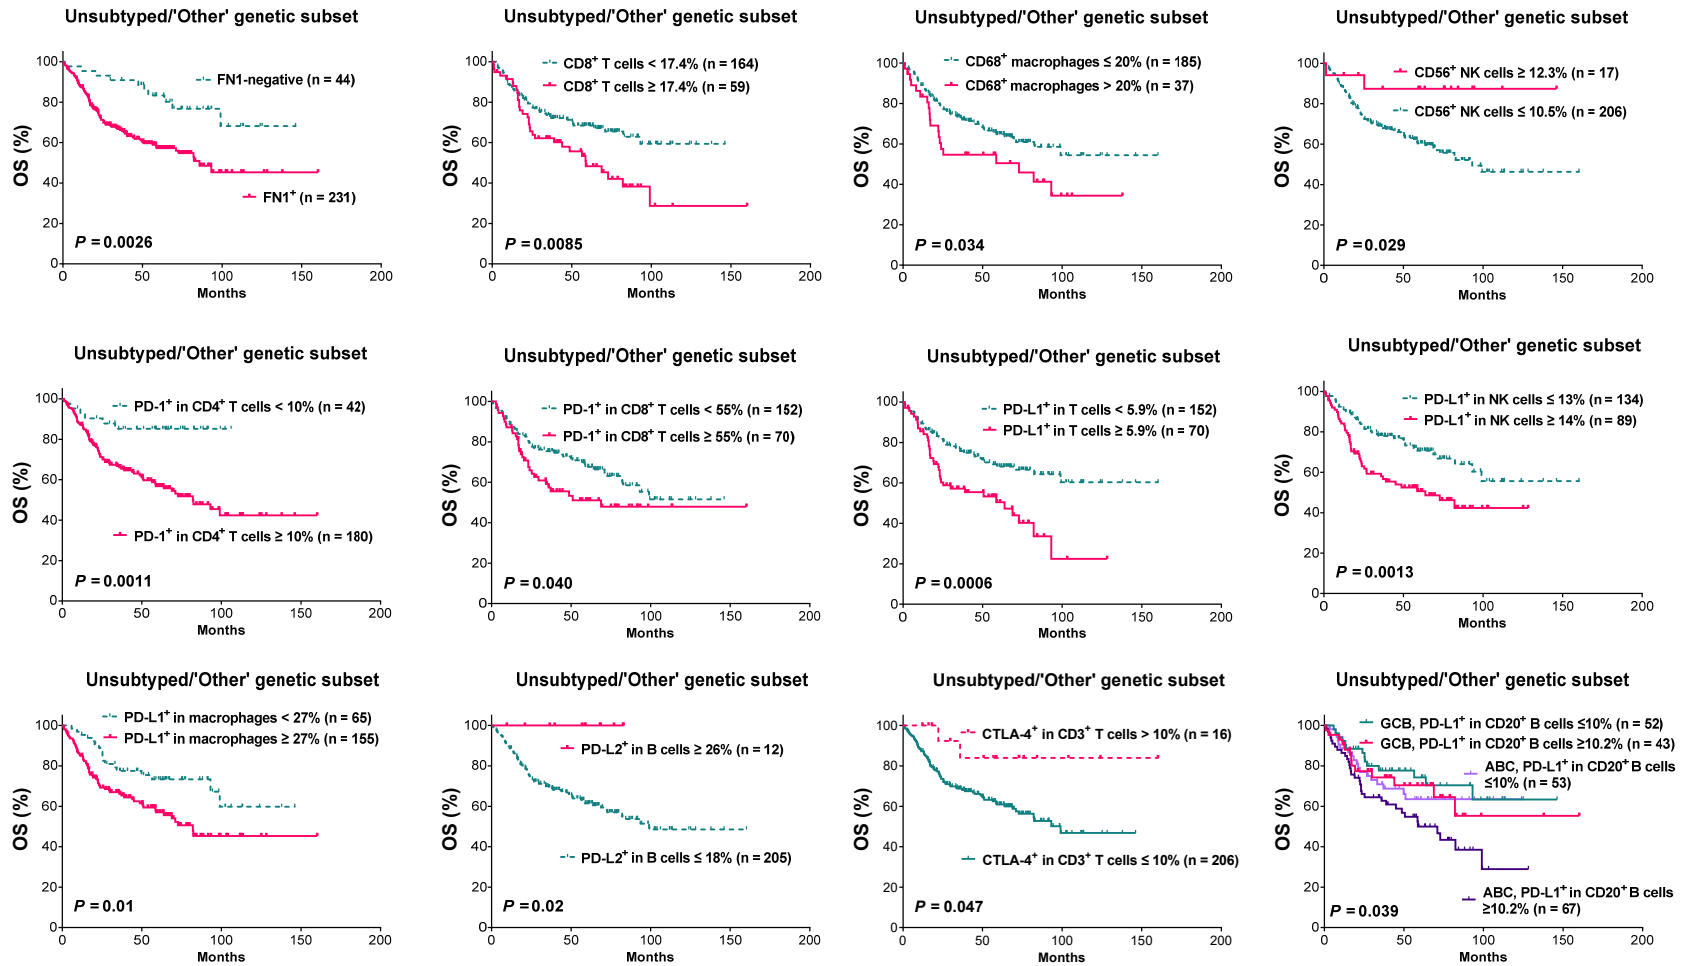

Supplement: NIHMS1804310-supplement-6.pdf [file NIHMS1804310-supplement-6.pdf]

**Figure S6**

**A**

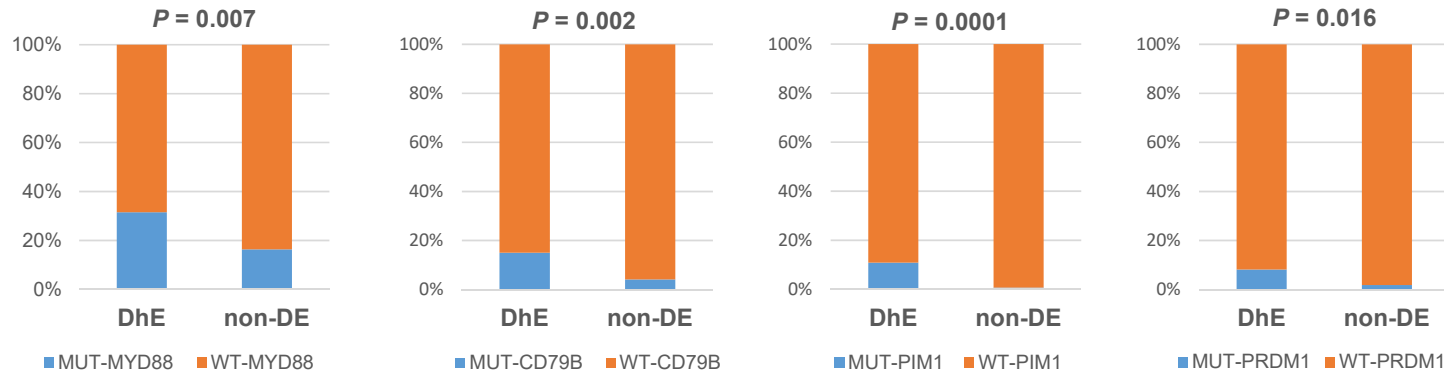

**B**

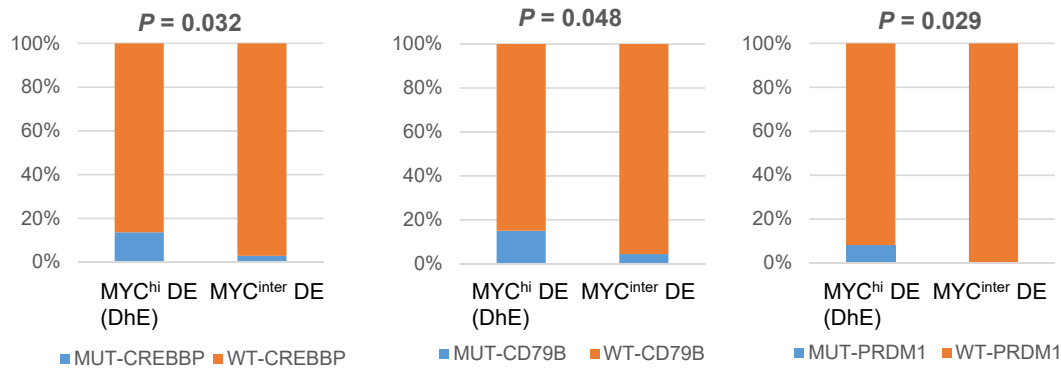

**C**

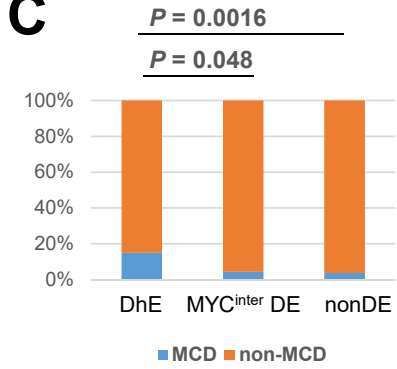

Supplement: NIHMS1804310-supplement-7.pdf [file NIHMS1804310-supplement-7.pdf]

**Figure S7**

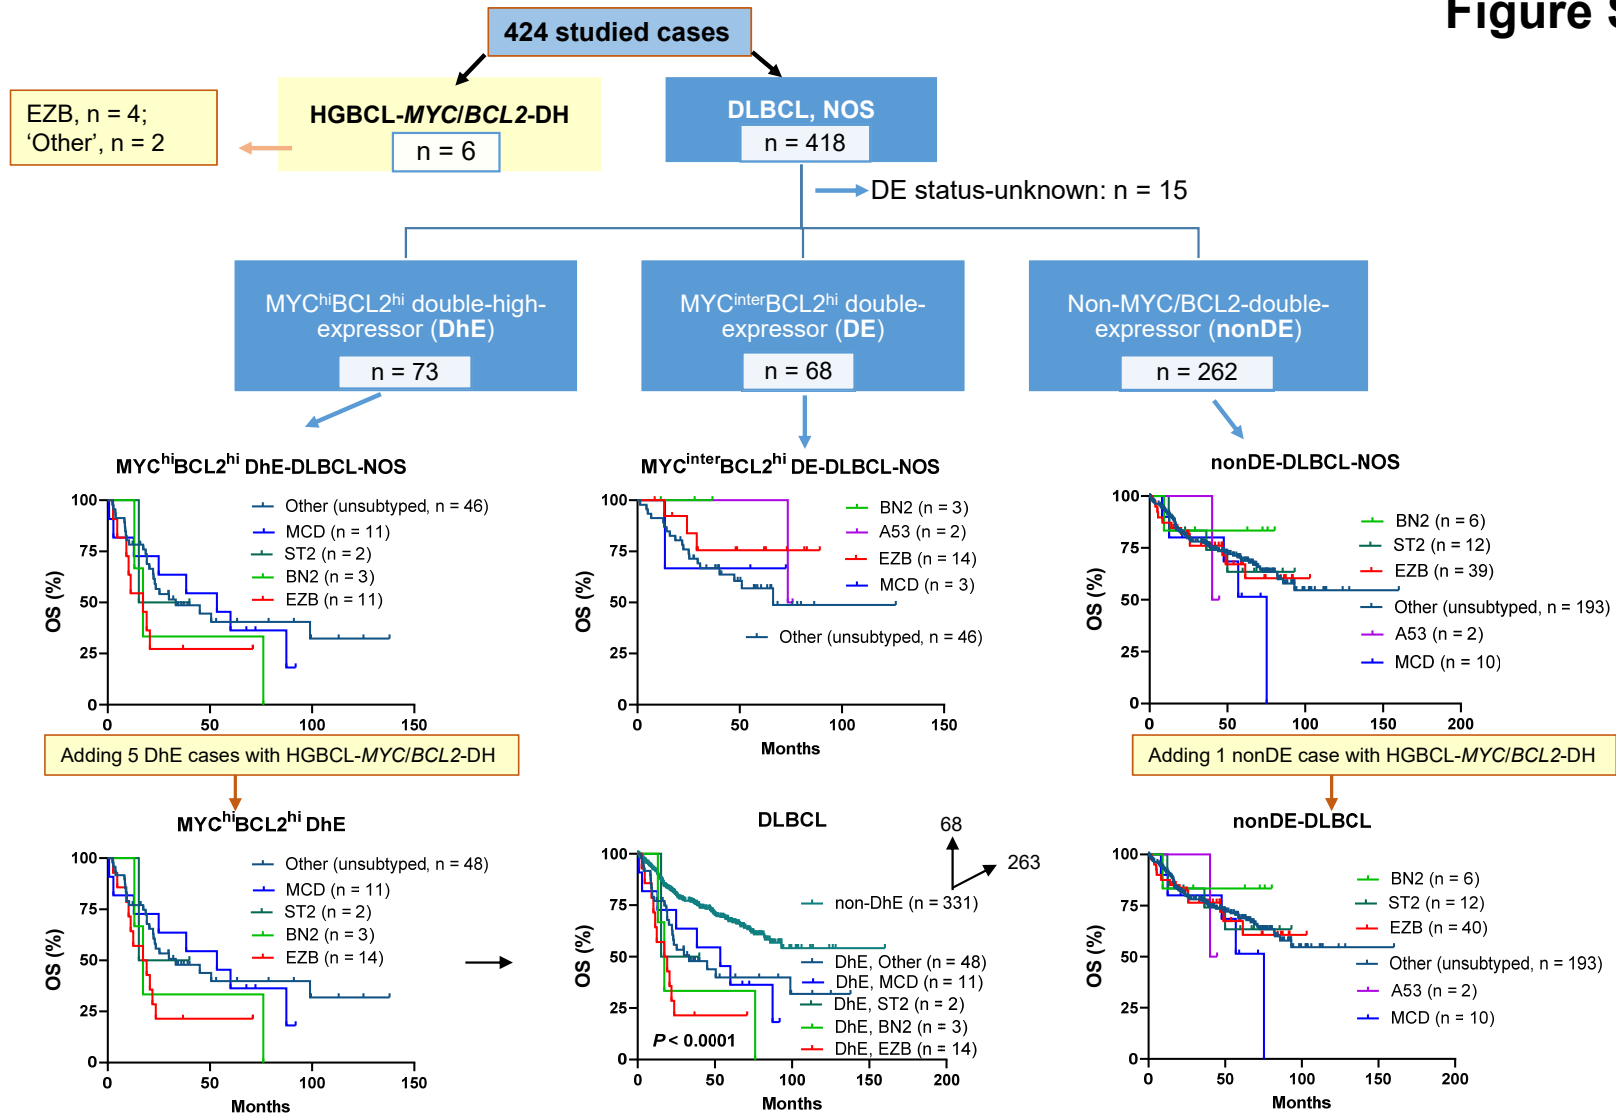

Supplement: NIHMS1804310-supplement-8.pdf [file NIHMS1804310-supplement-8.pdf]

Figure S8

A

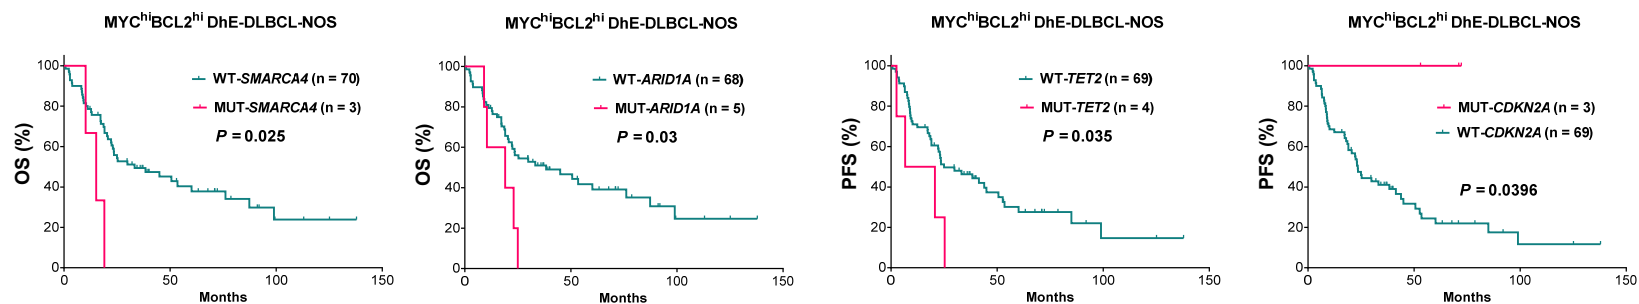

B

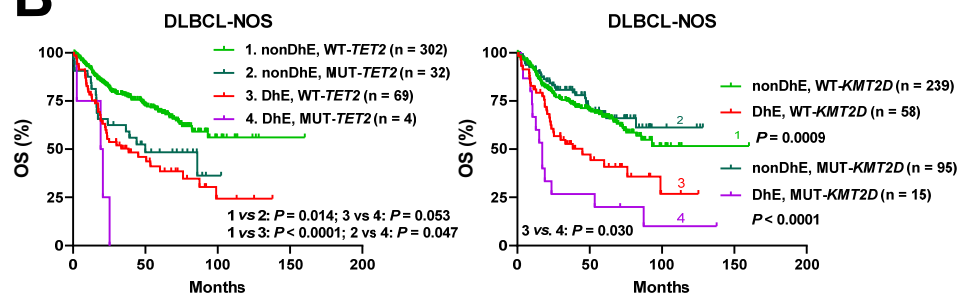

D

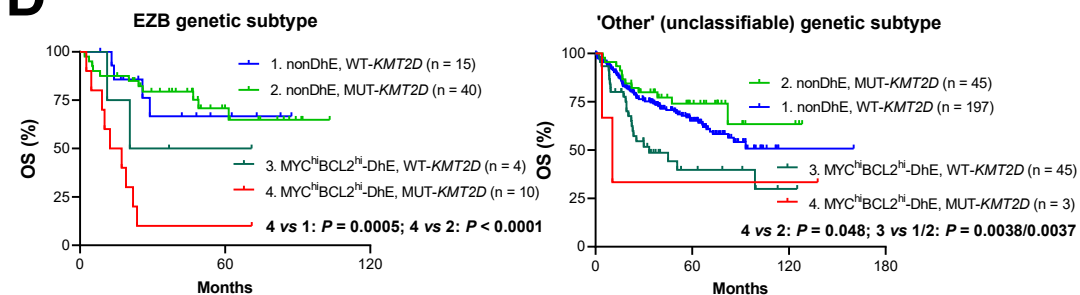

C

KMT2D mutation  
DhE, non-DhE  
EZB subtype

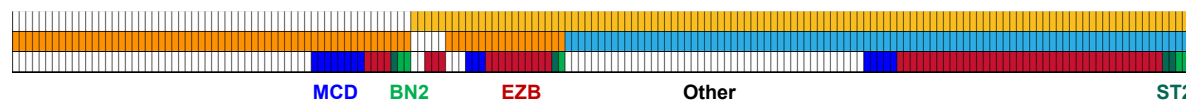

Supplement: NIHMS1804310-supplement-9.pdf [file NIHMS1804310-supplement-9.pdf]
